# Supplementary material for: Development of a Personalized Tumor Neoantigen Based Vaccine Formulation (FRAME-001) for Use in a Phase II Trial for the Treatment of Advanced Non-Small Cell Lung Cancer
Source: MDPI journal article supplement (doi:10.3390/pharmaceutics14071515), 2022-07-21
Supplement: s1 [file s1]

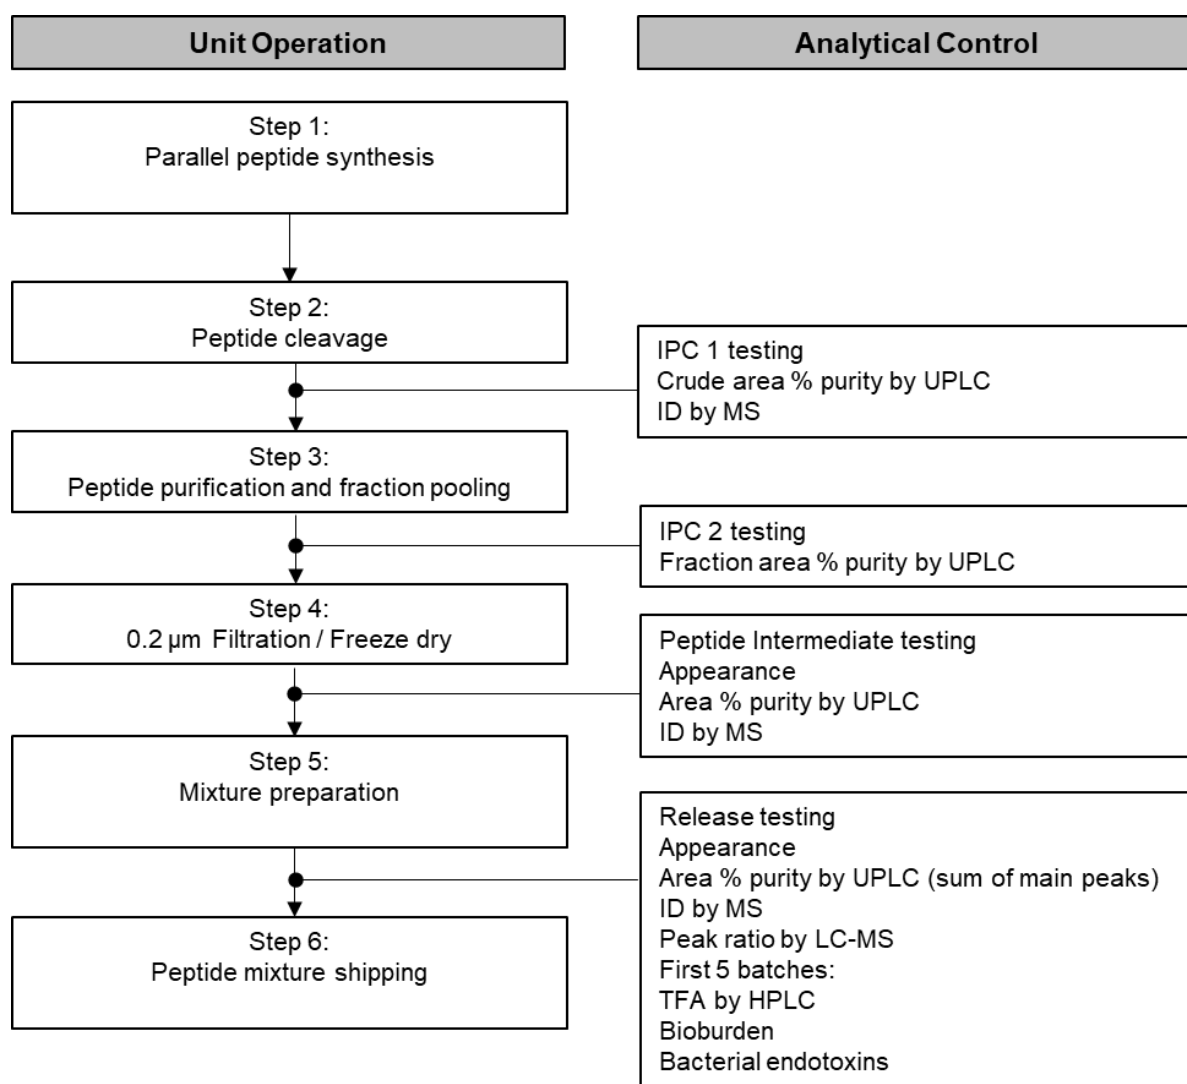

**Supplementary Figure S1.** Schematic representation of the peptide and peptide mixtures manufacturing platform.

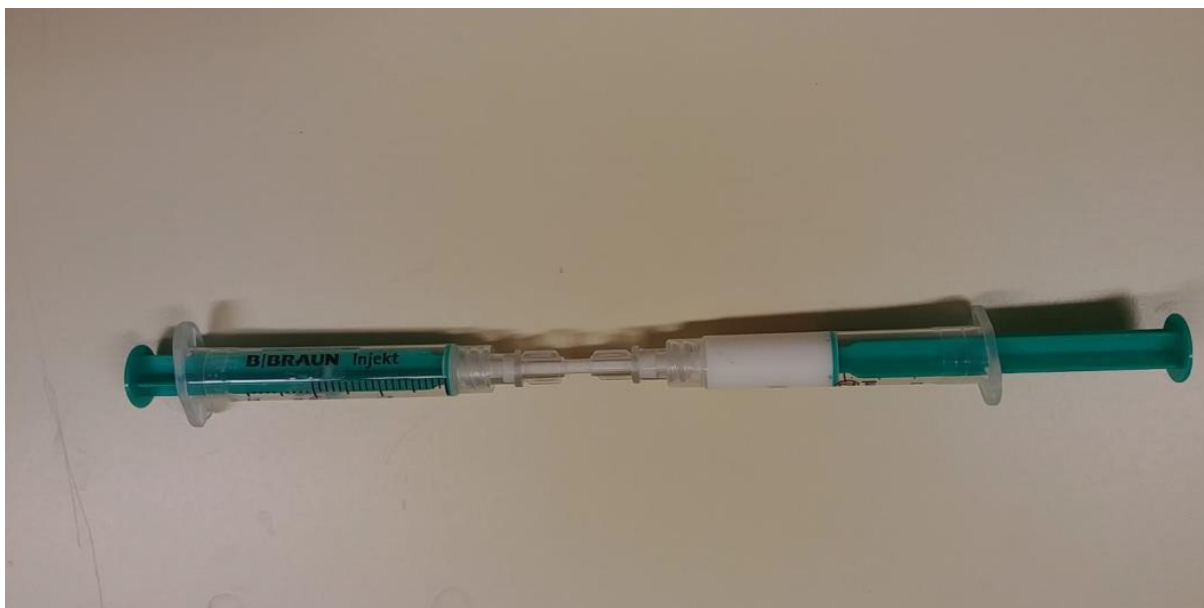

**Supplementary Figure S2.** The appearance of the emulsion that was formed by the two-syringe and i-connector method according to the instructions of the supplier (Seppic S.A., France).

**Supplementary Table S1.** The characteristics of the 20 different neoantigen peptides.

| Peptide   | Amino acid sequence             | [M+H] <sup>+</sup><br>monoisotopic<br>expected mass | pI   | Cysteine<br>content |
|-----------|---------------------------------|-----------------------------------------------------|------|---------------------|
| FRM001P01 | GCHLFSKRKCSQNKQSKRGKSRFYLSWRPL  | 3625.9                                              | 11.6 | 2                   |
| FRM001P02 | SVTNTSLAHELWKVPLHLKTSLLRPAHLRD  | 3432.9                                              | 10.6 | 0                   |
| FRM001P03 | RESSRPRGEETKRDQELEIAVGPEEAKLCL  | 3425.7                                              | 4.7  | 1                   |
| FRM001P04 | SSDELNRNGKMKAFSLARFQILNTKELKTT  | 3439.9                                              | 10.6 | 0                   |
| FRM001P05 | FMLIKNPMNVKNVERPLKCMATLPNIRKFI  | 3559.0                                              | 11.0 | 1                   |
| FRM001P06 | LVRNPMCVSSVGKPSDMVQPLKPIREFIGA  | 3268.7                                              | 9.9  | 1                   |
| FRM001P09 | REDNGLPMLSTNAMSWKTISAMEKRGARET  | 3380.6                                              | 9.9  | 0                   |
| FRM001P10 | NTDPSCSCVTPLDFNHCLKNREDNGLPMLS  | 3320.5                                              | 4.4  | 3                   |
| FRM001P11 | SAMEKRGARETQQQRKRVFRGRGVNSAK    | 3231.7                                              | 12.5 | 0                   |
| FRM001P12 | CKECGRPLDVVHTLLHIRAFMLIKNPMNVK  | 3475.9                                              | 9.8  | 2                   |
| FRM001P13 | GVDYASCGHLVKIWPRRMNRSDVCTVWS    | 3235.6                                              | 9.1  | 2                   |
| FRM001P14 | RHSPNGNGPRSQHHSLLITTNTDPSCSCVT  | 3103.4                                              | 8.3  | 2                   |
| FRM001P16 | ERPQDTHSCLPVREEDPGLRVRWRLMIASV  | 3545.8                                              | 7.2  | 1                   |
| FRM001P17 | AAEVRDPAVRLPLQGLPGQDLRGAHPAQA   | 3003.6                                              | 7.9  | 0                   |
| FRM001P18 | GQDLRGAHPAQAHAAGDALPGAQCGPPDLHR | 2967.5                                              | 6.3  | 0                   |
| FRM001P19 | HQLGQVRLRTATVLRPGAAAGRALPLVDAEL | 3249.9                                              | 12.0 | 0                   |
| FRM001P20 | AAGRALPLVDAELPADAAAEEVRDPAVRLPL | 3037.7                                              | 4.2  | 0                   |
| FRM001P21 | DGWRLPGVSRVQMESSRGRRRQGRQLRGQ   | 3521.9                                              | 12.7 | 0                   |
| FRM001P22 | DLNVERALRVRLPRLHQLGQVRLRTATVL   | 3450.0                                              | 12.5 | 0                   |
| FRM001P23 | VTLEERLDKACEPGVDYDGGTGVHFFQPRG  | 3329.6                                              | 4.4  | 1                   |

**Supplementary Table S2.** The long-term stability plan of the peptide mixtures that were produced under GMP conditions.

| <b>T = weeks <sup>1</sup></b> | <b>t=0</b> | <b>t=2 w</b> | <b>t=4 w</b> | <b>t=8 w</b> | <b>t=12 w</b> | <b>t=16 w</b> | <b>t=32 w <sup>2</sup></b> |
|-------------------------------|------------|--------------|--------------|--------------|---------------|---------------|----------------------------|
| Peptide Identity              | X          | X            | X            | X            | X             | X             | X                          |
| Peptide Purity                | X          | X            | X            | X            | X             | X             | X                          |
| Peptide peak ratio            | X          | X            | X            | X            | X             | X             | X                          |
| Bacterial Endotoxins          | X          | -            | -            | -            | -             | -             | X                          |
| Sterility                     | X          | -            | -            | -            | -             | -             | X                          |
| Appearance                    | X          | X            | X            | X            | X             | X             | X                          |
| pH                            | X          | -            | -            | X            | X             | X             | X                          |
| Osmolality                    | X          | -            | -            | X            | X             | X             | X                          |
| In-use stability              | X          | X            | X            | X            | X             | X             | X                          |

<sup>1</sup> : The stability samples stored at -80 °C were analyzed on timepoint T=8 weeks and every timepoint after that.

<sup>2</sup> : The sterility and endotoxin tests were only performed on the stability samples stored at -25 °C due to the limited amount of samples. For these tests, 8 vials (of the 32-34 vials) were needed according to the Ph. Eur. 2.6.1.

**Supplementary Table S3.** The release, in-use, and end of shelf life specifications for the stability study of the peptide mixtures.

| <b>Test</b>                     | <b>Release specification</b>                             | <b>End of shelf life specification</b>                |
|---------------------------------|----------------------------------------------------------|-------------------------------------------------------|
| Identity                        | [M+H] <sup>+</sup> monoisotopic expected mass ± 2 amu    | [M+H] <sup>+</sup> monoisotopic expected mass ± 2 amu |
| Peptide peak ratio <sup>1</sup> | Report result                                            | Report result                                         |
| Peptide Purity <sup>2</sup>     | ≥ 85 % area                                              | ≥ 85 % area                                           |
| Impurities (%) <sup>3</sup>     | Report relative retention time (RRT) and % area of total | Report RRT and % area of total                        |
| Peptide Ratio                   | Report result                                            | Report result                                         |
| Bacterial Endotoxins            | < 20 EU/mL                                               | < 20 EU/mL                                            |
| Sterility                       | Sterile                                                  | Sterile                                               |
| Appearance                      | Clear colorless solution                                 | Clear colorless solution                              |
| pH                              | 6-8                                                      | 6-8                                                   |
| Osmolality                      | 270-310 mOsm/kg                                          | 270-310 mOsm/kg                                       |

<sup>1</sup> : Peptide peak ratio is reported as the % area of the individual peptide chromatogram peak in relation to the sum of all peak areas of the individual peptides (= 100%).

<sup>2</sup> : Peptide purity is the sum of the main peptide peak areas divided by the total observed area on the chromatogram of the test sample.

<sup>3</sup> : Any observed chromatogram peak of ≥ 0.40% not corresponding to the main peptide peak areas.

**Supplementary Table S4.** The results of the filter experiment. Unfiltered and filtered test samples of the peptide mixture batches FRM001-M1, FRM001-M2, FRM001-M3, and FRM001-M4 were analyzed to investigate potential filter effects.

| FRM001M1       |           |               |            |          |
|----------------|-----------|---------------|------------|----------|
| Test           |           | Specification | Unfiltered | Filtered |
| Identity       | FRM001P01 | 3625.9 ± 2 u  | 3626.9 u   | 3626.9 u |
|                | FRM001P04 | 3439.9 ± 2 u  | 3439.9 u   | 3439.9 u |
|                | FRM001P05 | 3559.0 ± 2 u  | 3560.0 u   | 3560.0 u |
|                | FRM001P14 | 3103.4 ± 2 u  | 3103.4 u   | 3103.4 u |
|                | FRM001P19 | 3249.9 ± 2 u  | 3249.9 u   | 3249.9 u |
|                | FRM001P21 | 3521.9 ± 2 u  | 3521.9 u   | 3521.9 u |
| Peak ratio     | FRM001P01 | Report result | 14.8       | 15.0     |
|                | FRM001P04 | Report result | 16.3       | 16.1     |
|                | FRM001P05 | Report result | 25.2       | 25.2     |
|                | FRM001P14 | Report result | 10.9       | 10.8     |
|                | FRM001P19 | Report result | 22.8       | 23.1     |
|                | FRM001P21 | Report result | 9.9        | 9.8      |
| Peptide purity |           | ≥ 85 % area   | 98%        | 98%      |
| FRM001M2       |           |               |            |          |
| Identity       | FRM001P03 | 3425.7 ± 2 u  | 3425.8 u   | 3425.7 u |
|                | FRM001P10 | 3320.5 ± 2 u  | 3320.5 u   | 3320.5 u |
|                | FRM001P11 | 3231.7 ± 2 u  | 3231.8 u   | 3231.8 u |
|                | FRM001P12 | 3475.9 ± 2 u  | 3475.9 u   | 3475.9 u |
|                | FRM001P18 | 2967.5 ± 2 u  | 2967.5 u   | 2967.5 u |
|                | FRM001P22 | 3450.0 ± 2 u  | 3450.1 u   | 3450.1 u |
| Peak ratio     | FRM001P03 | Report result | 7.5        | 9.2      |
|                | FRM001P10 | Report result | 6.1        | 9.1      |
|                | FRM001P11 | Report result | 13.8       | 13.7     |
|                | FRM001P12 | Report result | 27.7       | 24.6     |
|                | FRM001P18 | Report result | 21.8       | 21.4     |
|                | FRM001P22 | Report result | 23.0       | 22.1     |
| Peptide purity |           | ≥ 85 % area   | 95%        | 95%      |
| FRM001M3       |           |               |            |          |
| Identity       | FRM001P02 | 3432.9 ± 2 u  | 3433.9 u   | 3434.0 u |
|                | FRM001P05 | 3559.0 ± 2 u  | 3559.9 u   | 3559.9 u |
|                | FRM001P06 | 3268.7 ± 2 u  | 3268.6 u   | 3268.7 u |
|                | FRM001P09 | 3380.6 ± 2 u  | 3380.8 u   | 3380.6 u |
|                | FRM001P18 | 2967.5 ± 2 u  | 2867.2 u   | 2967.2 u |
|                | FRM001P23 | 3329.6 ± 2 u  | 3329.5 u   | 3329.6 u |
| Peak ratio     | FRM001P02 | Report result | 18.6       | 18.7     |
|                | FRM001P05 | Report result | 22.2       | 22.7     |
|                | FRM001P06 | Report result | 16.9       | 16.4     |
|                | FRM001P09 | Report result | 14.2       | 14.2     |
|                | FRM001P18 | Report result | 16.3       | 16.2     |
|                | FRM001P23 | Report result | 11.9       | 11.8     |
| Peptide purity |           | ≥ 85 % area   | 96%        | 97%      |
| FRM001M4       |           |               |            |          |
| Identity       | FRM001P01 | 3625.9 ± 2 u  | 3625.8 u   | 3625.8 u |
|                | FRM001P11 | 3231.7 ± 2 u  | 3231.8 u   | 3231.5 u |
|                | FRM001P13 | 3235.6 ± 2 u  | 3235.5 u   | 3235.4 u |
|                | FRM001P16 | 3545.8 ± 2 u  | 3546.0 u   | 3545.7 u |
|                | FRM001P17 | 3003.6 ± 2 u  | 3003.4 u   | 3003.4 u |
|                | FRM001P20 | 3037.7 ± 2 u  | 3037.4 u   | 3037.9 u |
| Peak ratio     | FRM001P01 | Report result | 14.9       | 14.4     |
|                | FRM001P11 | Report result | 11.3       | 11.5     |
|                | FRM001P13 | Report result | 14.1       | 14.2     |
|                | FRM001P16 | Report result | 14.1       | 13.6     |
|                | FRM001P17 | Report result | 20.1       | 20.3     |
|                | FRM001P20 | Report result | 25.5       | 25.7     |
| Peptide purity |           | ≥ 85 % area   | 97%        | 97%      |

**Supplementary Table S5.** The chromatograms of the filtered and unfiltered test samples of the peptide mixtures FRM001-M1 and FRM001-M2.

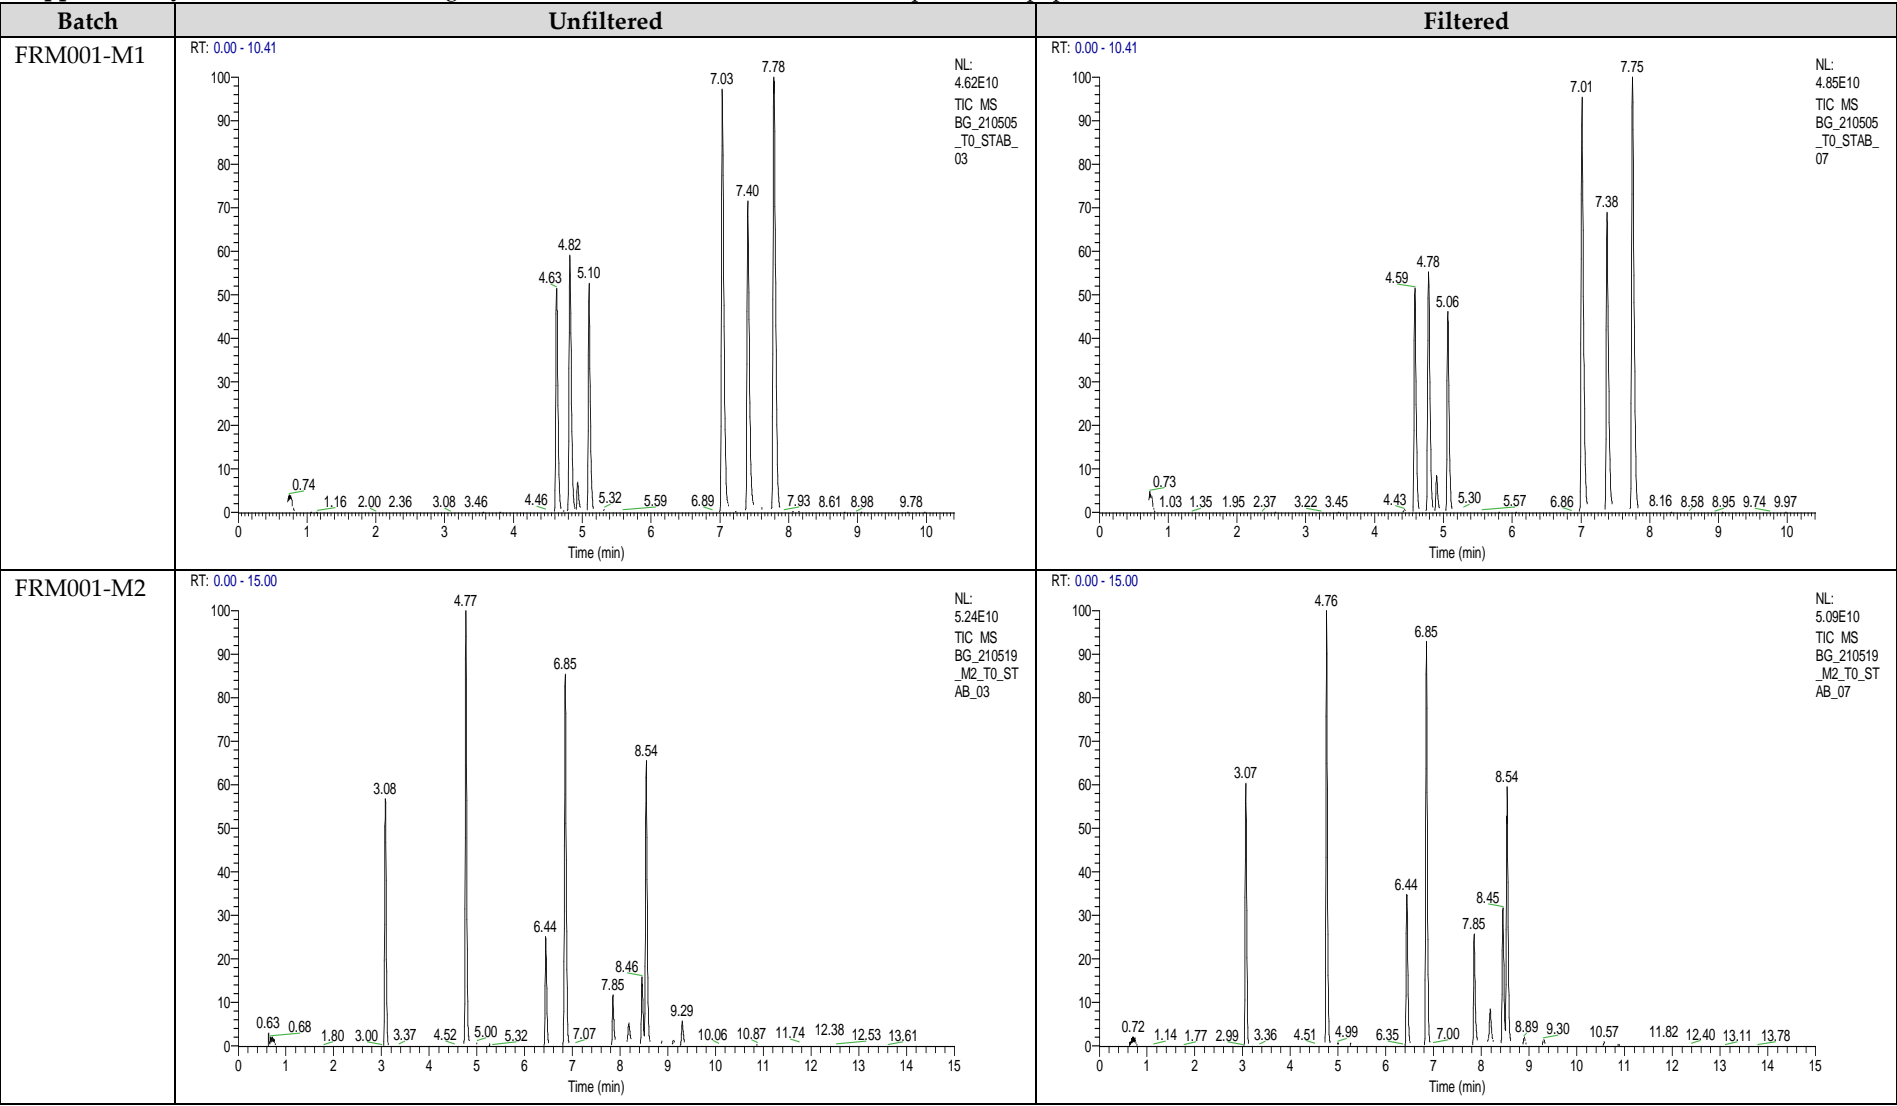

**Supplementary Table S6.** The chromatograms of the filtered and unfiltered test samples of the peptide mixtures FRM001-M3 and FRM001-M4.

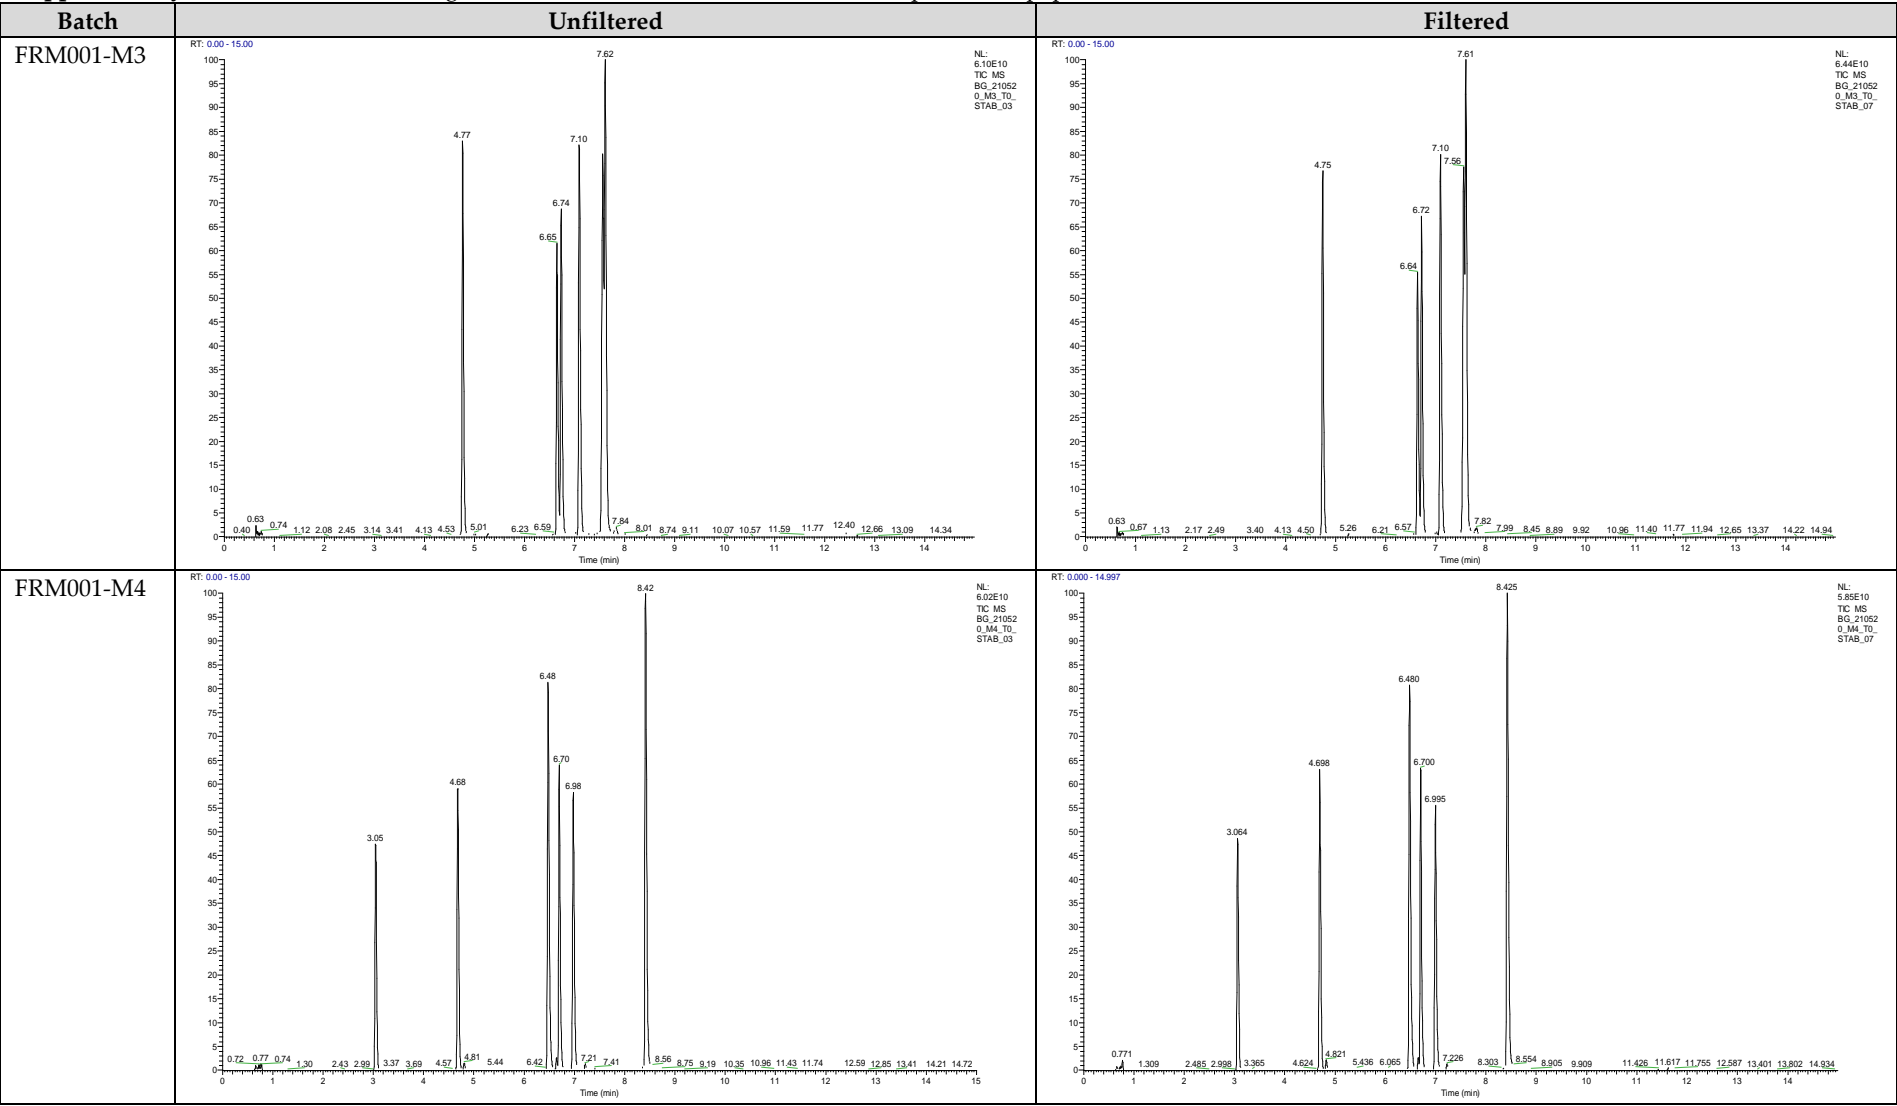

**Supplementary Table S7 (part 1/2).** The stability results of the FRM001-M2 peptide mixture stored at -25°C or -80°C.

| Test                        |           | Specification            | t=0w                               | t=2w -25 °C                                           | t=4w -25 °C                                                                                                                       | t=8w -25 °C                                                                                                                                                                                                   | t=8w -80 °C                        | t=12w -25 °C                                                                                | t=12w -80 °C             |
|-----------------------------|-----------|--------------------------|------------------------------------|-------------------------------------------------------|-----------------------------------------------------------------------------------------------------------------------------------|---------------------------------------------------------------------------------------------------------------------------------------------------------------------------------------------------------------|------------------------------------|---------------------------------------------------------------------------------------------|--------------------------|
| Identity                    | FRM001P03 | 3425.7 ± 2 u             | 3425.7                             | 3425.7                                                | 3425.7                                                                                                                            | 3425.7                                                                                                                                                                                                        | 3425.7                             | 3425.7                                                                                      | 3425.7                   |
|                             | FRM001P10 | 3320.5 ± 2 u             | 3320.5                             | 3320.5                                                | 3320.5                                                                                                                            | 3320.5                                                                                                                                                                                                        | 3320.5                             | 3320.5                                                                                      | 3320.5                   |
|                             | FRM001P11 | 3231.7 ± 2 u             | 3231.8                             | 2131.8                                                | 3231.8                                                                                                                            | 3231.8                                                                                                                                                                                                        | 3231.8                             | 3231.8                                                                                      | 3231.8                   |
|                             | FRM001P12 | 3475.9 ± 2 u             | 3475.9                             | 3475.8                                                | 3475.8                                                                                                                            | 3475.9                                                                                                                                                                                                        | 3475.9                             | 3475.9                                                                                      | 3475.9                   |
|                             | FRM001P18 | 2967.5 ± 2 u             | 2967.5                             | 2967.5                                                | 2967.5                                                                                                                            | 2967.5                                                                                                                                                                                                        | 2967.5                             | 2967.5                                                                                      | 2967.5                   |
|                             | FRM001P22 | 3450.0 ± 2 u             | 3450.1                             | 3450.1                                                | 3450.1                                                                                                                            | 3450.1                                                                                                                                                                                                        | 3450.1                             | 3450.1                                                                                      | 3450.1                   |
| Peak ratio (%)              | FRM001P03 | Report result            | 9.2                                | 9.2                                                   | 10.5                                                                                                                              | 9.9                                                                                                                                                                                                           | 10.3                               | 11.3                                                                                        | 11.0                     |
|                             | FRM001P10 | Report result            | 9.1                                | 7.2                                                   | 11.5                                                                                                                              | 11.0                                                                                                                                                                                                          | 12.9                               | 14.2                                                                                        | 13.8                     |
|                             | FRM001P11 | Report result            | 13.7                               | 14.7                                                  | 14.1                                                                                                                              | 14.9                                                                                                                                                                                                          | 14.8                               | 13.5                                                                                        | 14.2                     |
|                             | FRM001P12 | Report result            | 24.6                               | 22.0                                                  | 19.5                                                                                                                              | 19.6                                                                                                                                                                                                          | 20.5                               | 18.1                                                                                        | 20.0                     |
|                             | FRM001P18 | Report result            | 21.4                               | 22.1                                                  | 21.5                                                                                                                              | 21.5                                                                                                                                                                                                          | 19.8                               | 20.7                                                                                        | 19.9                     |
|                             | FRM001P22 | Report result            | 22.1                               | 24.2                                                  | 22.9                                                                                                                              | 23.1                                                                                                                                                                                                          | 21.3                               | 22.2                                                                                        | 21.2                     |
| Peptide purity              |           | ≥ 85% area               | 95%                                | 95%                                                   | 90%                                                                                                                               | 89%                                                                                                                                                                                                           | 95%                                | 95%                                                                                         | 96%                      |
| Impurities (%) <sup>1</sup> |           | Report result            | 0.76 (RRT 0.24)<br>0.47 (RRT 2.91) | 0.42 (RRT 0.23)<br>0.43 (RRT 2.91)<br>0.52 (RRT 3.46) | 0.50 (RRT 2.43)<br>0.50 (RRT 3.44)<br>2.23 (RRT 3.83)<br>0.57 (RRT 3.90)<br>0.71 (RRT 3.96)<br>0.76 (RRT 4.05)<br>2.88 (RRT 4.07) | 0.81 (RRT 0.21)<br>0.95 (RRT 0.22)<br>0.71 (RRT 0.24)<br>0.44 (RRT 0.64)<br>0.46 (RRT 2.48)<br>0.49 (RRT 3.44)<br>1.08 (RRT 3.54)<br>0.82 (RRT 3.61)<br>0.63 (RRT 3.78)<br>0.47 (RRT 3.85)<br>1.25 (RRT 4.07) | 0.54 (RRT 0.23)<br>0.72 (RRT 3.45) | 0.45 (RRT 0.57)<br>0.45 (RRT 0.61)<br>0.79 (RRT 2.44)<br>0.41 (RRT 3.41)<br>0.56 (RRT 4.03) | Not detected             |
| Bacterial Endotoxins        |           | < 20 EU/mL               | < 0.5 EU/mL                        | n/a                                                   | n/a                                                                                                                               | n/a                                                                                                                                                                                                           | n/a                                | n/a                                                                                         | n/a                      |
| Sterility                   |           | Sterile                  | Sterile                            | n/a                                                   | n/a                                                                                                                               | n/a                                                                                                                                                                                                           | n/a                                | n/a                                                                                         | n/a                      |
| Appearance                  |           | Clear colorless solution | Clear colorless solution           | Clear colorless solution                              | Clear colorless solution                                                                                                          | Clear colorless solution                                                                                                                                                                                      | Clear colorless solution           | Clear colorless solution                                                                    | Clear colorless solution |
| pH                          |           | 6-8                      | 7                                  | n/a                                                   | n/a                                                                                                                               | 7                                                                                                                                                                                                             | 7                                  | 7                                                                                           | 7                        |
| Osmolality (mOsm/kg)        |           | 270-310                  | 296                                | n/a                                                   | n/a                                                                                                                               | 300                                                                                                                                                                                                           | 300                                | 296                                                                                         | 298                      |

<sup>1</sup>: Result is reported as retention time relative to FRM001P11 (first eluting peptide) and % area of the total sum of areas if the impurity peak area is ≥ 0.40%.

**Supplementary Table S7 (continued part 2/2).** The stability results of the FRM001-M2 peptide mixture stored at -25°C and -80°C.

| Test                        |           | Specification            | t=0w                               | t=16w -25 °C                                                                                                                                         | t=16w -80 °C                                                                                                                                                                               | t=32w -25 °C                                                                                                                      | t=32w -80 °C                                                                                                                                                            |
|-----------------------------|-----------|--------------------------|------------------------------------|------------------------------------------------------------------------------------------------------------------------------------------------------|--------------------------------------------------------------------------------------------------------------------------------------------------------------------------------------------|-----------------------------------------------------------------------------------------------------------------------------------|-------------------------------------------------------------------------------------------------------------------------------------------------------------------------|
| Identity                    | FRM001P03 | 3425.7 ± 2 u             | 3425.7                             | 3425.7                                                                                                                                               | 3425.7                                                                                                                                                                                     | 3425.7                                                                                                                            | 3425.7                                                                                                                                                                  |
|                             | FRM001P10 | 3320.5 ± 2 u             | 3320.5                             | 3320.5                                                                                                                                               | 3320.5                                                                                                                                                                                     | 3320.5                                                                                                                            | 3320.5                                                                                                                                                                  |
|                             | FRM001P11 | 3231.7 ± 2 u             | 3231.8                             | 3231.8                                                                                                                                               | 3231.8                                                                                                                                                                                     | 3231.8                                                                                                                            | 3231.8                                                                                                                                                                  |
|                             | FRM001P12 | 3475.9 ± 2 u             | 3475.9                             | 3475.9                                                                                                                                               | 3475.9                                                                                                                                                                                     | 3475.9                                                                                                                            | 3475.9                                                                                                                                                                  |
|                             | FRM001P18 | 2967.5 ± 2 u             | 2967.5                             | 2967.5                                                                                                                                               | 2967.5                                                                                                                                                                                     | 2967.5                                                                                                                            | 2967.5                                                                                                                                                                  |
|                             | FRM001P22 | 3450.0 ± 2 u             | 3450.1                             | 3450.1                                                                                                                                               | 3450.1                                                                                                                                                                                     | 3450.1                                                                                                                            | 3450.1                                                                                                                                                                  |
| Peak ratio (%)              | FRM001P03 | Report result            | 9.2                                | 10.2                                                                                                                                                 | 10.3                                                                                                                                                                                       | 10.2                                                                                                                              | 10.1                                                                                                                                                                    |
|                             | FRM001P10 | Report result            | 9.1                                | 9.6                                                                                                                                                  | 10.4                                                                                                                                                                                       | 10.8                                                                                                                              | 10.7                                                                                                                                                                    |
|                             | FRM001P11 | Report result            | 13.7                               | 13.2                                                                                                                                                 | 13.4                                                                                                                                                                                       | 12.8                                                                                                                              | 13.1                                                                                                                                                                    |
|                             | FRM001P12 | Report result            | 24.6                               | 17.9                                                                                                                                                 | 19.5                                                                                                                                                                                       | 20.3                                                                                                                              | 22.6                                                                                                                                                                    |
|                             | FRM001P18 | Report result            | 21.4                               | 25.5                                                                                                                                                 | 24.1                                                                                                                                                                                       | 22.3                                                                                                                              | 21.8                                                                                                                                                                    |
|                             | FRM001P22 | Report result            | 22.1                               | 23.6                                                                                                                                                 | 22.3                                                                                                                                                                                       | 23.6                                                                                                                              | 21.8                                                                                                                                                                    |
| Peptide purity              |           | ≥ 85% area               | 95%                                | 86%                                                                                                                                                  | 87%                                                                                                                                                                                        | 90%                                                                                                                               | 88%                                                                                                                                                                     |
| Impurities (%) <sup>1</sup> |           | Report result            | 0.76 (RRT 0.24)<br>0.47 (RRT 2.91) | 1.17 (RRT 0.82)<br>0.41 (RRT 0.35)<br>0.42 (RRT 2.45)<br>0.92 (RRT 3.66)<br>0.80 (RRT 3.83)<br>0.53 (RRT 3.87)<br>0.59 (RRT 3.90)<br>1.44 (RRT 4.06) | 0.40 (RRT 0.36)<br>0.78 (RRT 0.82)<br>0.47 (RRT 3.64)<br>2.21 (RRT 3.70)<br>0.93 (RRT 3.76)<br>0.51 (RRT 3.81)<br>0.53 (RRT 3.81)<br>1.85 (RRT 3.87)<br>2.99 (RRT 4.00)<br>0.56 (RRT 4.08) | 0.74 (RRT 0.89)<br>0.53 (RRT 3.02)<br>0.78 (RRT 4.40)<br>0.59 (RRT 4.55)<br>2.15 (RRT 4.97)<br>0.63 (RRT 5.20)<br>0.50 (RRT 5.34) | 0.44 (RRT 4.36)<br>1.20 (RRT 4.41)<br>0.52 (RRT 4.59)<br>0.81 (RRT 4.94)<br>0.64 (RRT 4.99)<br>1.75 (RRT 5.20)<br>1.39 (RRT 5.23)<br>0.86 (RRT 5.27)<br>0.47 (RRT 5.32) |
| Bacterial Endotoxins        |           | < 20 EU/mL               | < 0.5 EU/mL                        | n/a                                                                                                                                                  | n/a                                                                                                                                                                                        | <0.5 EU/ml                                                                                                                        | n/a                                                                                                                                                                     |
| Sterility                   |           | Sterile                  | Sterile                            | n/a                                                                                                                                                  | n/a                                                                                                                                                                                        | Sterile                                                                                                                           | n/a                                                                                                                                                                     |
| Appearance                  |           | Clear colorless solution | Clear colorless solution           | Clear colorless solution                                                                                                                             | Clear colorless solution                                                                                                                                                                   | Clear colorless solution                                                                                                          | Clear colorless solution                                                                                                                                                |
| pH                          |           | 6-8                      | 7                                  | 7                                                                                                                                                    | 7                                                                                                                                                                                          | 7                                                                                                                                 | 7                                                                                                                                                                       |
| Osmolality (mOsm/kg)        |           | 270-310                  | 296                                | 308                                                                                                                                                  | 308                                                                                                                                                                                        | 295                                                                                                                               | 292                                                                                                                                                                     |

<sup>1</sup>: Result is reported as retention time relative to FRM001P11 (first eluting peptide) and % area of the total sum of areas if the impurity peak area is ≥ 0.40%.

**Supplementary Table S8 (part 1/2).** The stability results of the FRM001-M3 peptide mixture stored at -25°C and -80°C.

| Test                       |           | Specification            | t=0w                     | t=2w -25°C               | t=4w -25°C                                                               | t=8w -25°C                                            | t=8w -80°C                                                               | t=12w -25°C              | t=12w -80°C              |
|----------------------------|-----------|--------------------------|--------------------------|--------------------------|--------------------------------------------------------------------------|-------------------------------------------------------|--------------------------------------------------------------------------|--------------------------|--------------------------|
| Identity                   | FRM001P02 | 3432.9 ± 2 u             | 3434.0                   | 3432.9                   | 3432.9                                                                   | 3432.9                                                | 3432.9                                                                   | 3432.9                   | 3432.9                   |
|                            | FRM001P05 | 3559.0 ± 2 u             | 3559.9                   | 3559.9                   | 3559.9                                                                   | 3559.9                                                | 3559.9                                                                   | 3559.9                   | 3559.9                   |
|                            | FRM001P06 | 3268.7 ± 2 u             | 3268.7                   | 3269.7                   | 3268.8                                                                   | 3269.7                                                | 3269.7                                                                   | 3269.7                   | 3269.7                   |
|                            | FRM001P09 | 3380.6 ± 2 u             | 3380.6                   | 3380.7                   | 3380.7                                                                   | 3380.6                                                | 3380.6                                                                   | 3380.6                   | 3380.6                   |
|                            | FRM001P18 | 2967.5 ± 2 u             | 2967.2                   | 2967.5                   | 2967.5                                                                   | 2967.1                                                | 2967.1                                                                   | 2967.1                   | 2967.1                   |
|                            | FRM001P23 | 3329.6 ± 2 u             | 3329.6                   | 3329.6                   | 3329.6                                                                   | 3329.6                                                | 3329.6                                                                   | 3329.6                   | 3329.6                   |
| Peak ratio (%)             | FRM001P02 | Report result            | 18.7                     | 18.8                     | 18.6                                                                     | 19.9                                                  | 20.2                                                                     | 19.1                     | 19.8                     |
|                            | FRM001P05 | Report result            | 22.7                     | 24.3                     | 21.2                                                                     | 20.9                                                  | 13.1                                                                     | 22.6                     | 12.4                     |
|                            | FRM001P06 | Report result            | 16.4                     | 14.4                     | 17.8                                                                     | 14.2                                                  | 22.4                                                                     | 14.8                     | 25.1                     |
|                            | FRM001P09 | Report result            | 14.2                     | 14.3                     | 14.3                                                                     | 15.1                                                  | 14.8                                                                     | 15.1                     | 14.6                     |
|                            | FRM001P18 | Report result            | 16.2                     | 16.1                     | 16.3                                                                     | 16.6                                                  | 17.0                                                                     | 15.8                     | 15.6                     |
|                            | FRM001P23 | Report result            | 11.8                     | 12.1                     | 12.1                                                                     | 13.3                                                  | 12.4                                                                     | 12.6                     | 12.4                     |
| Peptide purity             |           | ≥ 85% area               | 97%                      | 96%                      | 95%                                                                      | 96%                                                   | 94 %                                                                     | 97%                      | 97%                      |
| Impurities (%)*            |           | Report result            | 0.45 (RRT 1.65)          | 1.21 (RRT 1.65)          | 0.58 (RRT 0.16)<br>0.48 (RRT 2.40)<br>0.73 (RRT 2.48)<br>0.58 (RRT 2.62) | 0.47 (RRT 0.13)<br>0.49 (RRT 0.15)<br>0.45 (RRT 1.64) | 0.43 (RRT 0.13)<br>0.48 (RRT 2.43)<br>0.46 (RRT 2.58)<br>0.71 (RRT 2.62) | Not detected             | Not detected             |
| Bacterial Endotoxins       |           | < 20 EU/mL               | <0.05 EU/mL              | n/a                      | n/a                                                                      | n/a                                                   | n/a                                                                      | n/a                      | n/a                      |
| Sterility                  |           | Sterile                  | Sterile                  | n/a                      | n/a                                                                      | n/a                                                   | n/a                                                                      | n/a                      | n/a                      |
| Appearance                 |           | Clear colorless solution | Clear colorless solution | Clear colorless solution | Clear colorless solution                                                 | Clear colorless solution                              | Clear colorless solution                                                 | Clear colorless solution | Clear colorless solution |
| pH**                       |           | 6-8                      | 7                        | n/a                      | n/a                                                                      | 7                                                     | 7                                                                        | 7                        | 7                        |
| Osmolality (mOsm/kg)<br>** |           | 270-310                  | 293                      | n/a                      | n/a                                                                      | 297                                                   | 298                                                                      | 297                      | 297                      |

\* Result is reported as retention time relative to FRM001P18 (first eluting peptide) and % area of the total sum of areas if the impurity peak area is ≥ 0.40%.

\*\* These tests will only be performed on the engineering batches of the Drug Product.

**Supplementary Table S8 (continued part 2/2).** The stability results of the FRM001-M3 peptide mixture stored at -25°C and -80°C.

| Test                        |           | Specification            | t=0w                     | t=16w -25°C              | t=16w -80°C                                                              | t=32w -25°C                                                                                 | t=32w -80°C                                           |
|-----------------------------|-----------|--------------------------|--------------------------|--------------------------|--------------------------------------------------------------------------|---------------------------------------------------------------------------------------------|-------------------------------------------------------|
| Identity                    | FRM001P02 | 3432.9 ± 2 u             | 3434.0                   | 3432.9                   | 3432.9                                                                   | 3432.9                                                                                      | 3432.9                                                |
|                             | FRM001P05 | 3559.0 ± 2 u             | 3559.9                   | 3559.9                   | 3559.9                                                                   | 3559.9                                                                                      | 3559.9                                                |
|                             | FRM001P06 | 3268.7 ± 2 u             | 3268.7                   | 3269.7                   | 3269.7                                                                   | 3269.7                                                                                      | 3269.7                                                |
|                             | FRM001P09 | 3380.6 ± 2 u             | 3380.6                   | 3380.6                   | 3380.6                                                                   | 3380.6                                                                                      | 3380.6                                                |
|                             | FRM001P18 | 2967.5 ± 2 u             | 2967.2                   | 2967.1                   | 2967.1                                                                   | 2967.1                                                                                      | 2967.1                                                |
|                             | FRM001P23 | 3329.6 ± 2 u             | 3329.6                   | 3329.6                   | 3329.6                                                                   | 3329.6                                                                                      | 3329.6                                                |
| Peak ratio (%)              | FRM001P02 | Report result            | 18.7                     | 18.5                     | 18.3                                                                     | 19.3                                                                                        | 19.3                                                  |
|                             | FRM001P05 | Report result            | 22.7                     | 20.4                     | 23.4                                                                     | 22.3                                                                                        | 22.7                                                  |
|                             | FRM001P06 | Report result            | 16.4                     | 21.6                     | 18.8                                                                     | 16.3                                                                                        | 16.0                                                  |
|                             | FRM001P09 | Report result            | 14.2                     | 12.7                     | 12.6                                                                     | 14.1                                                                                        | 14.1                                                  |
|                             | FRM001P18 | Report result            | 16.2                     | 16.4                     | 16.5                                                                     | 17.0                                                                                        | 16.7                                                  |
|                             | FRM001P23 | Report result            | 11.8                     | 10.4                     | 10.3                                                                     | 11.0                                                                                        | 11.1                                                  |
| Peptide purity              |           | ≥ 85% area               | 97%                      | 92%                      | 92%                                                                      | 93%                                                                                         | 94%                                                   |
| Impurities (%) <sup>1</sup> |           | Report result            | 0.45 (RRT 1.65)          | 0.52 (RRT 0.53)          | 0.43 (RRT 0.09)<br>0.41 (RRT 0.23)<br>0.53 (RRT 0.53)<br>0.86 (RRT 2.58) | 0.51 (RRT 2.56)<br>1.35 (RRT 2.80)<br>0.97 (RRT 2.90)<br>1.15 (RRT 2.91)<br>0.57 (RRT 2.92) | 0.55 (RRT 2.81)<br>1.01 (RRT 2.89)<br>1.37 (RRT 2.91) |
| Bacterial Endotoxins        |           | < 20 EU/mL               | <0.05 EU/mL              | n/a                      | n/a                                                                      | <0.5 EU/ml                                                                                  | n/a                                                   |
| Sterility                   |           | Sterile                  | Sterile                  | n/a                      | n/a                                                                      | Sterile                                                                                     | n/a                                                   |
| Appearance                  |           | Clear colorless solution | Clear colorless solution | Clear colorless solution | Clear colorless solution                                                 | Clear colorless solution                                                                    | Clear colorless solution                              |
| pH                          |           | 6-8                      | 7                        | 7                        | 7                                                                        | 7                                                                                           | 7                                                     |
| Osmolality (mOsm/kg)        |           | 270-310                  | 293                      | 299                      | 297                                                                      | 278                                                                                         | 289                                                   |

<sup>1</sup>: Result is reported as retention time relative to FRM001P18 (first eluting peptide) and % area of the total sum of areas if the impurity peak area is ≥ 0.40%.

**Supplementary Table S9 (part 1/2).** The stability results of the FRM001-M4 peptide mixture stored at -25°C and -80°C.

| Test                        |           | Specification            | t=0w                     | t=2w -25 °C                        | t=4w -25 °C                                           | t=8w -25 °C                                                                                                                       | t=8w -80 °C                        | t=12w -25 °C                       | t=12w -80 °C             |
|-----------------------------|-----------|--------------------------|--------------------------|------------------------------------|-------------------------------------------------------|-----------------------------------------------------------------------------------------------------------------------------------|------------------------------------|------------------------------------|--------------------------|
| Identity                    | FRM001P01 | 3625.9 ± 2 u             | 3625.8                   | 3625.8                             | 3625.9                                                | 3625.7                                                                                                                            | 3625.7                             | 3625.7                             | 3625.7                   |
|                             | FRM001P11 | 3231.7 ± 2 u             | 3231.5                   | 3231.8                             | 3232.8                                                | 3232.8                                                                                                                            | 3232.8                             | 3232.8                             | 3232.8                   |
|                             | FRM001P13 | 3235.6 ± 2 u             | 3235.4                   | 3236.4                             | 3236.6                                                | 3235.6                                                                                                                            | 3235.6                             | 3235.6                             | 3235.6                   |
|                             | FRM001P16 | 3545.8 ± 2 u             | 3545.7                   | 3545.7                             | 3545.8                                                | 3545.8                                                                                                                            | 3545.8                             | 3545.8                             | 3545.8                   |
|                             | FRM001P17 | 3003.6 ± 2 u             | 3003.4                   | 3003.6                             | 3003.6                                                | 3003.6                                                                                                                            | 3003.6                             | 3003.6                             | 3003.6                   |
|                             | FRM001P20 | 3037.7 ± 2 u             | 3037.9                   | 3037.6                             | 3037.7                                                | 3037.7                                                                                                                            | 3037.7                             | 3037.7                             | 3037.7                   |
| Peak ratio (%)              | FRM001P01 | Report result            | 14.4                     | 14.5                               | 15.4                                                  | 15.1                                                                                                                              | 15.2                               | 15.1                               | 14.8                     |
|                             | FRM001P11 | Report result            | 11.5                     | 11.7                               | 12.1                                                  | 12.7                                                                                                                              | 12.9                               | 12.8                               | 12.3                     |
|                             | FRM001P13 | Report result            | 14.2                     | 13.6                               | 14.6                                                  | 14.7                                                                                                                              | 14.9                               | 14.4                               | 14.6                     |
|                             | FRM001P16 | Report result            | 13.6                     | 13.1                               | 13.4                                                  | 13.1                                                                                                                              | 13.4                               | 13.6                               | 13.4                     |
|                             | FRM001P17 | Report result            | 20.3                     | 21.0                               | 20.4                                                  | 20.4                                                                                                                              | 19.9                               | 19.5                               | 20.0                     |
|                             | FRM001P20 | Report result            | 25.7                     | 26.0                               | 24.0                                                  | 24.0                                                                                                                              | 23.7                               | 24.6                               | 24.8                     |
| Peptide purity              |           | ≥ 85% area               | 97%                      | 96%                                | 93%                                                   | 91%                                                                                                                               | 96%                                | 96 %                               | 98%                      |
| Impurities (%) <sup>1</sup> |           | Report result            | 0.43 (RRT 0.23)          | 0.46 (RRT 0.23)<br>0.56 (RRT 3.84) | 1.13 (RRT 3.63)<br>1.10 (RRT 3.85)<br>0.60 (RRT 4.08) | 0.59 (RRT 0.21)<br>0.85 (RRT 0.23)<br>0.44 (RRT 3.56)<br>0.52 (RRT 3.63)<br>0.55 (RRT 3.74)<br>0.92 (RRT 3.85)<br>2.81 (RRT 4.03) | 0.72 (RRT 0.25)<br>0.40 (RRT 2.21) | 0.41 (RRT 3.73)<br>0.57 (RRT 4.08) | Not detected             |
| Bacterial Endotoxins        |           | < 20 EU/mL               | <0.05 EU/mL              | n/a                                | n/a                                                   | n/a                                                                                                                               | n/a                                | n/a                                | n/a                      |
| Sterility                   |           | Sterile                  | Sterile                  | n/a                                | n/a                                                   | n/a                                                                                                                               | n/a                                | n/a                                | n/a                      |
| Appearance                  |           | Clear colorless solution | Clear colorless solution | Clear colorless solution           | Clear colorless solution                              | Clear colorless solution                                                                                                          | Clear colorless solution           | Clear colorless solution           | Clear colorless solution |
| pH                          |           | 6-8                      | 7                        | n/a                                | n/a                                                   | 7                                                                                                                                 | 7                                  | 7                                  | 7                        |
| Osmolality (mOsm/kg)        |           | 270-310                  | 294                      | n/a                                | n/a                                                   | 297                                                                                                                               | 298                                | 298                                | 298                      |

<sup>1</sup>: Result is reported as retention time relative to FRM001P11 (first eluting peptide) and % area of the total sum of areas if the impurity peak area is ≥ 0.40%.

**Supplementary Table S9 (continued part 2/2).** The stability results of the FRM001-M4 peptide mixture stored at -25°C and -80°C.

| Test                        |           | Specification            | t=0w                     | t=16w -25 °C                       | t=16w -80 °C                       | t=32w -25 °C                                                                                                   | t=32w -80 °C                                                                                                                                                                                                                     |
|-----------------------------|-----------|--------------------------|--------------------------|------------------------------------|------------------------------------|----------------------------------------------------------------------------------------------------------------|----------------------------------------------------------------------------------------------------------------------------------------------------------------------------------------------------------------------------------|
| Identity                    | FRM001P01 | 3625.9 ± 2 u             | 3625.8                   | 3625.7                             | 3625.7                             | 3625.7                                                                                                         | 3625.7                                                                                                                                                                                                                           |
|                             | FRM001P11 | 3231.7 ± 2 u             | 3231.5                   | 3232.8                             | 3232.8                             | 3232.8                                                                                                         | 3232.8                                                                                                                                                                                                                           |
|                             | FRM001P13 | 3235.6 ± 2 u             | 3235.4                   | 3235.6                             | 3235.6                             | 3235.6                                                                                                         | 3235.6                                                                                                                                                                                                                           |
|                             | FRM001P16 | 3545.8 ± 2 u             | 3545.7                   | 3545.8                             | 3545.8                             | 3545.8                                                                                                         | 3545.8                                                                                                                                                                                                                           |
|                             | FRM001P17 | 3003.6 ± 2 u             | 3003.4                   | 3003.6                             | 3003.6                             | 3003.6                                                                                                         | 3003.6                                                                                                                                                                                                                           |
|                             | FRM001P20 | 3037.7 ± 2 u             | 3037.9                   | 3037.7                             | 3037.7                             | 3037.7                                                                                                         | 3037.7                                                                                                                                                                                                                           |
| Peak ratio (%)              | FRM001P01 | Report result            | 14.4                     | 12.5                               | 12.5                               | 12.9                                                                                                           | 14.7                                                                                                                                                                                                                             |
|                             | FRM001P11 | Report result            | 11.5                     | 11.0                               | 11.1                               | 10.8                                                                                                           | 12.1                                                                                                                                                                                                                             |
|                             | FRM001P13 | Report result            | 14.2                     | 13.3                               | 13.1                               | 13.6                                                                                                           | 13.9                                                                                                                                                                                                                             |
|                             | FRM001P16 | Report result            | 13.6                     | 10.6                               | 10.8                               | 11.0                                                                                                           | 13.1                                                                                                                                                                                                                             |
|                             | FRM001P17 | Report result            | 20.3                     | 21.9                               | 22.0                               | 21.8                                                                                                           | 20.9                                                                                                                                                                                                                             |
|                             | FRM001P20 | Report result            | 25.7                     | 30.7                               | 30.5                               | 29.9                                                                                                           | 25.3                                                                                                                                                                                                                             |
| Peptide purity              |           | ≥ 85% area               | 97%                      | 91%                                | 91%                                | 90%                                                                                                            | 88%                                                                                                                                                                                                                              |
| Impurities (%) <sup>1</sup> |           | Report result            | 0.43 (RRT 0.23)          | 0.53 (RRT 0.26)<br>0.72 (RRT 0.82) | 0.49 (RRT 0.36)<br>0.69 (RRT 0.82) | 0.42 (RRT 4.50)<br>0.47 (RRT 4.75)<br>1.73 (RRT 4.97)<br>1.62 (RRT 5.17)<br>0.42 (RRT 5.14)<br>0.82 (RRT 5.20) | 0.72 (RRT 4.52)<br>0.60 (RRT 4.59)<br>0.73 (RRT 4.61)<br>0.44 (RRT 4.65)<br>0.64 (RRT 4.66)<br>0.42 (RRT 4.74)<br>0.73 (RRT 4.79)<br>0.50 (RRT 4.85)<br>0.97 (RRT 4.91)<br>1.10 (RRT 5.19)<br>1.56 (RRT 5.23)<br>0.95 (RRT 5.27) |
| Bacterial Endotoxins        |           | < 20 EU/mL               | <0.05 EU/mL              | n/a                                | n/a                                | <0.5 EU/ml                                                                                                     | n/a                                                                                                                                                                                                                              |
| Sterility                   |           | Sterile                  | Sterile                  | n/a                                | n/a                                | Sterile                                                                                                        | n/a                                                                                                                                                                                                                              |
| Appearance                  |           | Clear colorless solution | Clear colorless solution | Clear colorless solution           | Clear colorless solution           | Clear colorless solution                                                                                       | Clear colorless solution                                                                                                                                                                                                         |
| pH                          |           | 6-8                      | 7                        | 7                                  | 7                                  | 7                                                                                                              | 7                                                                                                                                                                                                                                |
| Osmolality (mOsm/kg)        |           | 270-310                  | 294                      | 298                                | 304                                | 299                                                                                                            | 282                                                                                                                                                                                                                              |

<sup>1</sup>: Result is reported as retention time relative to FRM001P11 (first eluting peptide) and % area of the total sum of areas if the impurity peak area is ≥ 0.40%.

**Supplementary Table S10 (part 1/2).** The results of the in-use stability of the FRM001-M1 batch. After the t=0 h analysis, the same sample was stored at room temperature and analyzed again after 2 h and 4 h. For readability, only the 0 h and 4h data are presented; all 2h data were similar and complied.

| Test                    |           | t=0w               | t=2w -25 °C       |                    | t=4w -25 °C                                                    |                                          | t=8w -25 °C                                                                                                                                            |                    | t=8w -80 °C                                                    |                    | t=12w -25 °C                                                                         |                                          | t=12w -80 °C       |                    |
|-------------------------|-----------|--------------------|-------------------|--------------------|----------------------------------------------------------------|------------------------------------------|--------------------------------------------------------------------------------------------------------------------------------------------------------|--------------------|----------------------------------------------------------------|--------------------|--------------------------------------------------------------------------------------|------------------------------------------|--------------------|--------------------|
|                         |           | 0h                 | 0h                | 4h                 | 0h                                                             | 4h                                       | 0h                                                                                                                                                     | 4h                 | 0h                                                             | 4h                 | 0h                                                                                   | 4h                                       | 0h                 | 4h                 |
| Peak ratio %            | FRM001P01 | 15.0               | 15.0              | 15.2               | 14.6                                                           | 14.8                                     | 15.2                                                                                                                                                   | 15.3               | 15.0                                                           | 15.2               | 15.9                                                                                 | 15.3                                     | 15.5               | 15.3               |
|                         | FRM001P04 | 16.1               | 15.7              | 15.8               | 16.7                                                           | 16.7                                     | 16.7                                                                                                                                                   | 16.6               | 16.6                                                           | 16.4               | 16.4                                                                                 | 16.9                                     | 17.3               | 16.9               |
|                         | FRM001P05 | 25.2               | 25.1              | 24.6               | 25.4                                                           | 25.1                                     | 25.3                                                                                                                                                   | 25.7               | 25.3                                                           | 25.6               | 24.5                                                                                 | 24.6                                     | 26.8               | 24.6               |
|                         | FRM001P14 | 10.8               | 11.2              | 11.3               | 10.5                                                           | 10.5                                     | 10.9                                                                                                                                                   | 10.8               | 10.8                                                           | 10.7               | 11.9                                                                                 | 11.2                                     | 7.6                | 11.2               |
|                         | FRM001P19 | 23.1               | 22.8              | 22.8               | 22.1                                                           | 22.1                                     | 21.3                                                                                                                                                   | 20.9               | 21.7                                                           | 21.5               | 19.9                                                                                 | 21.2                                     | 21.6               | 21.2               |
|                         | FRM001P21 | 9.8                | 10.2              | 10.3               | 10.7                                                           | 10.7                                     | 10.6                                                                                                                                                   | 10.7               | 10.7                                                           | 10.6               | 11.3                                                                                 | 10.9                                     | 11.1               | 10.9               |
| Peptide purity          |           | 98%                | 98%               | 98%                | 95%                                                            | 96%                                      | 94%                                                                                                                                                    | 96%                | 96%                                                            | 97%                | 94%                                                                                  | 96%                                      | 98%                | 96%                |
| Impurities <sup>1</sup> |           | 0.47<br>(RRT 0.16) | 0.41<br>(RRT1.70) | 0.53<br>(RTT 0.17) | 0.62<br>(RRT 2.60)<br>0.67<br>(RRT 2.71)<br>0.51<br>(RRT 2.79) | 0.62<br>(RRT 0.14)<br>0.49<br>(RRT 0.15) | 0.46<br>(RRT 0.15)<br>0.65<br>(RRT 2.39)<br>0.41<br>(RRT 2.43)<br>0.63<br>(RRT 2.60)<br>0.60<br>(RRT 2.63)<br>0.58<br>(RRT 2.70)<br>0.48<br>(RRT 2.76) | 0.48<br>(RRT 0.17) | 0.53<br>(RRT 0.16)<br>0.48<br>(RRT 2.58)<br>0.51<br>(RRT 2.72) | 0.41<br>(RRT 0.16) | 0.51<br>(RRT 2.51)<br>0.69<br>(RRT 2.56)<br>0.46<br>(RRT 2.62)<br>1.60<br>(RRT 2.73) | 0.43<br>(RRT 0.14)<br>0.48<br>(RRT 0.16) | 0.44<br>(RRT 0.16) | 0.41<br>(RRT 0.16) |

<sup>1</sup>: Result is reported as retention time relative to FRM001P14 (first eluting peptide) and % area of the total sum of areas if the impurity peak area is ≥ 0.40%.

**Supplementary Table S10 (continued part 2/2).** The results of the in-use stability of the FRM001-M1 batch. After the t=0 h analysis, the same sample was stored at room temperature and analyzed again after 2 h and 4 h. For readability, only the 0 h and 4h data are presented; all 2h data were similar and complied.

| Test                    |           | t=0w            | t=16w -25 °C                       |              | t=16w -80 °C    |              | t=32w -25 °C                                                                                                                                         |                                                                                             | t=32w -80 °C                                                             |                                                                          |
|-------------------------|-----------|-----------------|------------------------------------|--------------|-----------------|--------------|------------------------------------------------------------------------------------------------------------------------------------------------------|---------------------------------------------------------------------------------------------|--------------------------------------------------------------------------|--------------------------------------------------------------------------|
|                         |           | 0h              | 0h                                 | 4h           | 0h              | 4h           | 0h                                                                                                                                                   | 4h                                                                                          | 0h                                                                       | 4h                                                                       |
| Peak ratio %            | FRM001P01 | 15.0            | 15.4                               | 15.5         | 15.3            | 15.6         | 3626.9                                                                                                                                               | 14.1                                                                                        | 14.2                                                                     | 14.1                                                                     |
|                         | FRM001P04 | 16.1            | 17.2                               | 17.0         | 16.6            | 16.6         | 3439.9                                                                                                                                               | 17.1                                                                                        | 16.7                                                                     | 16.7                                                                     |
|                         | FRM001P05 | 25.2            | 25.6                               | 25.5         | 25.7            | 25.3         | 3560.0                                                                                                                                               | 25.2                                                                                        | 24.9                                                                     | 25.2                                                                     |
|                         | FRM001P14 | 10.8            | 10.1                               | 10.5         | 10.7            | 10.6         | 3103.4                                                                                                                                               | 10.9                                                                                        | 11.8                                                                     | 11.5                                                                     |
|                         | FRM001P19 | 23.1            | 21.5                               | 21.2         | 21.4            | 21.2         | 3249.9                                                                                                                                               | 21.8                                                                                        | 21.4                                                                     | 21.6                                                                     |
|                         | FRM001P21 | 9.8             | 10.1                               | 10.3         | 10.3            | 10.6         | 3521.9                                                                                                                                               | 10.8                                                                                        | 11.1                                                                     | 11.0                                                                     |
| Peptide purity          |           | 98%             | 97%                                | 98%          | 97%             | 98%          | 92%                                                                                                                                                  | 94%                                                                                         | 95%                                                                      | 95%                                                                      |
| Impurities <sup>1</sup> |           | 0.47 (RRT 0.16) | 0.40 (RRT 2.58)<br>0.61 (RRT 2.73) | Not detected | 0.52 (RRT 2.63) | Not detected | 0.81 (RRT 2.74)<br>0.55 (RRT 2.79)<br>0.88 (RRT 2.84)<br>1.12 (RRT 2.98)<br>2.09 (RRT 3.01)<br>1.11 (RRT 3.12)<br>0.92 (RRT 3.16)<br>0.53 (RRT 3.21) | 0.40 (RRT 2.91)<br>1.37 (RRT 3.12)<br>0.96 (RRT 3.14)<br>0.56 (RRT 3.16)<br>0.70 (RRT 3.21) | 0.44 (RRT 2.96)<br>0.78 (RRT 3.12)<br>0.65 (RRT 3.14)<br>0.56 (RRT 3.16) | 0.48 (RRT 3.00)<br>0.91 (RRT 3.13)<br>0.66 (RRT 3.16)<br>0.56 (RRT 3.17) |

<sup>1</sup>: Result is reported as retention time relative to FRM001P14 (first eluting peptide) and % area of the total sum of areas if the impurity peak area is ≥ 0.40%.

**Supplementary Table S11 (part 1/2).** The results of the in-use stability of the FRM001-M2 batch. After the t=0 h analysis, the same sample was stored at room temperature and analyzed again after 2 h and 4 h. For readability, only the 0 h and 4h data are presented; all 2h data were similar and complied.

| Test                    |           | t=0w               | t=2w -25 °C        |                    | t=4w -25 °C        |                    | t=8w -25 °C        |                    | t=8w -80 °C        |                    | t=12w -25 °C       |                    | t=12w -80 °C |              |
|-------------------------|-----------|--------------------|--------------------|--------------------|--------------------|--------------------|--------------------|--------------------|--------------------|--------------------|--------------------|--------------------|--------------|--------------|
|                         |           | 0h                 | 0h                 | 4h                 | 0h           | 4h           |
| Peak ratio %            | FRM001P03 | 9.2                | 9.2                | 9.7                | 10.5               | 10.4               | 9.9                | 10.3               | 10.3               | 10.5               | 11.3               | 11.1               | 11.0         | 11.0         |
|                         | FRM001P10 | 9.1                | 7.2                | 8.9                | 11.5               | 12.1               | 11.0               | 12.1               | 12.9               | 12.0               | 14.2               | 13.7               | 13.8         | 13.2         |
|                         | FRM001P11 | 13.7               | 14.7               | 13.8               | 14.1               | 13.5               | 14.9               | 14.2               | 14.8               | 14.7               | 13.5               | 13.2               | 14.2         | 14.1         |
|                         | FRM001P12 | 24.6               | 22.0               | 23.0               | 19.5               | 20.5               | 19.5               | 21.0               | 20.5               | 21.0               | 18.1               | 19.7               | 20.0         | 20.6         |
|                         | FRM001P18 | 21.4               | 22.1               | 21.5               | 21.5               | 21.5               | 21.5               | 20.4               | 19.8               | 20.1               | 20.7               | 20.3               | 19.9         | 19.9         |
|                         | FRM001P22 | 22.1               | 24.2               | 23.1               | 22.9               | 21.9               | 23.1               | 22.1               | 21.6               | 21.8               | 22.2               | 21.9               | 21.2         | 21.2         |
| Peptide purity          |           | 95%                | 95%                | 94%                | 90%                | 94%                | 89%                | 94%                | 95%                | 95%                | 95%                | 95%                | 96%          | 96%          |
| Impurities <sup>1</sup> |           | 0.76<br>(RRT 0.24) | 0.42<br>(RRT 0.23) | 0.56<br>(RRT 0.23) | 0.50<br>(RRT 2.43) | 0.59<br>(RRT 0.58) | 0.81<br>(RRT 0.21) | 0.47<br>(RRT 0.24) | 0.54<br>(RRT 0.23) | 0.47<br>(RRT 0.21) | 0.45<br>(RRT 0.57) | 0.41<br>(RRT 0.59) | Not detected | Not detected |
|                         |           | 0.47<br>(RRT 2.91) | 0.43<br>(RRT 2.91) |                    | 0.50<br>(RRT 3.44) | 0.45<br>(RRT 2.44) | 0.95<br>(RRT 0.22) | 0.42<br>(RRT 0.60) | 0.23<br>(RRT 0.24) | 0.63<br>(RRT 0.24) | 0.45<br>(RRT 0.61) | 0.46<br>(RRT0.63)  |              |              |
|                         |           |                    | 0.52<br>(RRT 3.46) |                    | 2.23<br>(RRT 3.83) | 0.55<br>(RRT 3.45) | 0.71<br>(RRT 0.24) | 0.45<br>(RRT 2.48) | 0.72<br>(RRT 3.45) | 0.59<br>(RRT 3.45) | 0.79<br>(RRT 2.44) | 0.49<br>(RRT 2.44) |              |              |
|                         |           |                    |                    |                    | 0.57<br>(RRT 3.90) | 1.16<br>(RRT 3.89) | 0.44<br>(RRT 0.64) | 0.48<br>(RRT 3.45) |                    |                    | 0.41<br>(RRT 3.41) | 0.67<br>(RRT 3.41) |              |              |
|                         |           |                    |                    |                    | 0.71<br>(RRT 3.96) |                    | 0.46<br>(RRT 2.48) |                    |                    |                    | 0.56<br>(RRT 4.03) | 0.66<br>(RRT 2.46) |              |              |
|                         |           |                    |                    |                    | 0.76<br>(RRT 4.05) |                    | 0.49<br>(RRT 3.44) |                    |                    |                    |                    | 0.40<br>(RRT 2.55) |              |              |
|                         |           |                    |                    |                    | 2.88<br>(RRT 4.07) |                    | 1.08<br>(RRT 3.54) |                    |                    |                    |                    |                    |              |              |
|                         |           |                    |                    |                    |                    |                    | 0.82<br>(RRT 3.61) |                    |                    |                    |                    |                    |              |              |
|                         |           |                    |                    |                    |                    |                    | 0.63<br>(RRT 3.79) |                    |                    |                    |                    |                    |              |              |
|                         |           |                    |                    |                    |                    |                    | 0.47<br>(RRT 3.85) |                    |                    |                    |                    |                    |              |              |
|                         |           |                    |                    |                    |                    |                    | 1.25<br>(RRT 0.64) |                    |                    |                    |                    |                    |              |              |
|                         |           |                    |                    |                    |                    |                    |                    |                    |                    |                    |                    |                    |              |              |
|                         |           |                    |                    |                    |                    |                    |                    |                    |                    |                    |                    |                    |              |              |
|                         |           |                    |                    |                    |                    |                    |                    |                    |                    |                    |                    |                    |              |              |
|                         |           |                    |                    |                    |                    |                    |                    |                    |                    |                    |                    |                    |              |              |
|                         |           |                    |                    |                    |                    |                    |                    |                    |                    |                    |                    |                    |              |              |
|                         |           |                    |                    |                    |                    |                    |                    |                    |                    |                    |                    |                    |              |              |
|                         |           |                    |                    |                    |                    |                    |                    |                    |                    |                    |                    |                    |              |              |

<sup>1</sup>: Result is reported as retention time relative to FRM001P11 (first eluting peptide) and % area of the total sum of areas if the impurity peak area is  $\geq 0.40\%$ .

**Supplementary Table S11 (continued part 2/2).** The results of the in-use stability of the FRM001-M2 batch. After the t=0 h analysis, the same sample was stored at room temperature and analyzed again after 2 h and 4 h. For readability, only the 0 h and 4h data are presented; all 2h data were similar and complied.

| Test                    |           | t=0w            | t=16w -25 °C    |                 | t=16w -80 °C    |                 | t=32w -25 °C    |                 | t=32w -80 °C   |                 |
|-------------------------|-----------|-----------------|-----------------|-----------------|-----------------|-----------------|-----------------|-----------------|----------------|-----------------|
|                         |           | 0h              | 0h              | 4h              | 0h              | 4h              | 0h              | 4h              | 0h             | 4h              |
| Peak ratio %            | FRM001P03 | 9.2             | 10.2            | 10.5            | 10.3            | 10.3            | 10.2            | 10.1            | 10.1           | 9.7             |
|                         | FRM001P10 | 9.1             | 9.6             | 10.2            | 10.4            | 10.1            | 10.8            | 9.6             | 10.7           | 9.3             |
|                         | FRM001P11 | 13.7            | 13.2            | 12.7            | 13.4            | 13.4            | 12.8            | 12.8            | 13.1           | 12.9            |
|                         | FRM001P12 | 24.6            | 17.9            | 18.9            | 19.5            | 20.0            | 20.3            | 22.7            | 22.6           | 24.2            |
|                         | FRM001P18 | 21.4            | 25.5            | 24.7            | 24.1            | 24.0            | 22.3            | 22.3            | 21.8           | 21.9            |
|                         | FRM001P22 | 22.1            | 23.6            | 23.0            | 22.3            | 22.2            | 23.6            | 22.5            | 21.8           | 21.9            |
| Peptide purity          |           | 95%             | 86%             | 90%             | 87%             | 89%             | 90%             | 90%             | 88%            | 92%             |
| Impurities <sup>1</sup> |           | 0.76 (RRT 0.24) | 1.17 (RRT 0.82) | 0.48 (RRT0.30)  | 0.40 (RRT 0.36) | 0.43 (RRT 0.23) | 0.74 (RRT 0.89) | 0.57 (RRT 0.89) | 0.44 (RRT4.36) | 0.42 (RRT 4.41) |
|                         |           | 0.47 (RRT 2.91) | 0.41 (RRT 0.35) |                 | 0.78 (RRT 0.82) | 0.82 (RRT 0.82) | 0.53 (RRT 3.02) | 1.00 (RRT 5.20) |                | 0.75 (RRT 5.20) |
|                         |           |                 | 0.42 (RRT 2.45) |                 | 0.47 (RRT 3.64) | 1.40 (RRT 4.08) | 0.78 (RRT 4.40) | 1.26 (RRT 5.23) | 1.20 (RRT4.41) | 1.42 (RRT 5.23) |
|                         |           |                 | 0.92 (RRT 3.66) | 1.01 (RRT 0.82) | 2.21 (RRT 3.70) |                 | 0.59 (RRT 4.55) | 0.68 (RRT 5.28) |                | 0.80 (RRT 5.26) |
|                         |           |                 | 0.80 (RRT 3.83) |                 | 0.93 (RRT 3.76) |                 | 2.15 (RRT 4.97) | 0.41 (RRT 3.16) | 0.52 (RRT4.59) | 0.72 (RRT 4.96) |
|                         |           |                 | 0.53 (RRT 3.87) |                 | 0.51 (RRT 3.81) |                 | 0.63 (RRT 5.20) | 0.70 (RRT 4.94) |                |                 |
|                         |           |                 | 0.59 (RRT 3.90) | 0.41 (RRT 2.46) | 1.85 (RRT 3.87) |                 | 0.50 (RRT 5.34) | 0.41 (RRT 5.31) | 0.81 (RRT4.94) |                 |
|                         |           |                 | 1.44 (RRT 4.06) |                 | 0.53 (RRT 3.81) |                 |                 |                 | 0.64 (RRT4.99) |                 |
|                         |           |                 |                 |                 | 2.99 (RRT 4.00) |                 |                 |                 |                |                 |
|                         |           |                 |                 |                 | 0.56 (RRT 4.08) |                 |                 |                 | 1.75 (RRT5.20) |                 |
|                         |           |                 |                 |                 |                 |                 |                 |                 | 1.39 (RRT5.23) |                 |
|                         |           |                 |                 |                 |                 |                 |                 |                 | 0.86 (RRT5.27) |                 |
|                         |           |                 |                 |                 |                 |                 |                 |                 | 0.47 (RRT5.32) |                 |

<sup>1</sup>: Result is reported as retention time relative to peptide FRM001P11 (first eluting peptide) and % area of the total sum of areas if the impurity peak area is ≥ 0.40%.

**Supplementary Table S12 (part 1/2).** The results of the in-use stability of the FRM001-M3 batch. After the t=0 h analysis, the same sample was stored at room temperature and analyzed again after 2 h and 4 h. For readability, only the 0 h and 4h data are presented; all 2h data were similar and complied.

| Test                    |           | t=0w               | t=2w -25 °C        |                    | t=4w -25 °C                                                                          |                    | t=8w -25 °C                                              |                                                                | t=8w -80 °C                                                                          |                                        | t=12w -25 °C |              | t=12w -80 °C |              |
|-------------------------|-----------|--------------------|--------------------|--------------------|--------------------------------------------------------------------------------------|--------------------|----------------------------------------------------------|----------------------------------------------------------------|--------------------------------------------------------------------------------------|----------------------------------------|--------------|--------------|--------------|--------------|
|                         |           | 0h                 | 0h                 | 4h                 | 0h                                                                                   | 4h                 | 0h                                                       | 4h                                                             | 0h                                                                                   | 4h                                     | 0h           | 4h           | 0h           | 4h           |
| Peak ratio %            | FRM001P02 | 18.7               | 18.8               | 19.0               | 18.6                                                                                 | 18.6               | 19.9                                                     | 19.8                                                           | 20.2                                                                                 | 20.6                                   | 19.1         | 19.3         | 19.8         | 19.6         |
|                         | FRM001P05 | 22.7               | 24.3               | 21.9               | 21.2                                                                                 | 19.5               | 14.2                                                     | 12.3                                                           | 13.1                                                                                 | 12.9                                   | 14.8         | 13.8         | 12.4         | 17.6         |
|                         | FRM001P06 | 16.4               | 14.4               | 16.5               | 17.8                                                                                 | 18.9               | 20.9                                                     | 22.8                                                           | 22.4                                                                                 | 21.2                                   | 22.6         | 23.9         | 25.1         | 19.9         |
|                         | FRM001P09 | 14.2               | 14.3               | 14.3               | 14.3                                                                                 | 14.3               | 15.1                                                     | 15.2                                                           | 14.8                                                                                 | 15.5                                   | 15.1         | 15.1         | 14.6         | 14.7         |
|                         | FRM001P18 | 16.2               | 16.1               | 16.2               | 16.3                                                                                 | 16.4               | 16.6                                                     | 16.8                                                           | 17.0                                                                                 | 17.3                                   | 15.8         | 15.5         | 15.6         | 15.7         |
|                         | FRM001P23 | 11.8               | 12.1               | 12.1               | 12.1                                                                                 | 12.2               | 13.3                                                     | 13.1                                                           | 12.4                                                                                 | 12.5                                   | 12.6         | 12.3         | 12.4         | 12.5         |
| Peptide purity          |           | 97%                | 96%                | 96%                | 95%                                                                                  | 97%                | 89%                                                      | 94%                                                            | 94%                                                                                  | 96%                                    | 97%          | 97%          | 97%          | 97%          |
| Impurities <sup>1</sup> |           | 0.45<br>(RRT 1.65) | 1.21<br>(RRT 1.65) | 0.61<br>(RRT 1.64) | 0.58<br>(RRT 0.16)<br>0.48<br>(RRT 2.40)<br>0.73<br>(RRT 2.48)<br>0.58<br>(RRT 2.62) | 0.48<br>(RRT 1.65) | 0.46<br>(RRT 0.13)<br>0.13<br>0.52<br>(RRT 0.15)<br>0.15 | 0.47<br>(RRT 0.13)<br>0.49<br>(RRT 0.15)<br>0.45<br>(RRT 1.64) | 0.43<br>(RRT 0.13)<br>0.48<br>(RRT 2.42)<br>0.46<br>(RRT 2.58)<br>0.71<br>(RRT 2.62) | 0.60<br>(RRT0.16)<br>0.50<br>(RRT1.62) | Not detected | Not detected | Not detected | Not detected |

<sup>1</sup>: Result is reported as retention time relative to peptide FRM001P18 (first eluting peptide) and % area of the total sum of areas if the impurity peak area is ≥ 0.40%.

**Supplementary Table S12 (continued part 2/2).** The results of the in-use stability of the FRM001-M3 batch. After the t=0 h analysis, the same sample was stored at room temperature and analyzed again after 2 h and 4 h. For readability, only the 0 h and 4h data are presented; all 2h data were similar and complied.

| Test                    |           | t=0w               | t=16w -25 °C    |                 | t=16w -80 °C                                                             |                 | t=32w -25 °C                                                                           |                                                                                                                | t=32w -80 °C                                          |                                                    |
|-------------------------|-----------|--------------------|-----------------|-----------------|--------------------------------------------------------------------------|-----------------|----------------------------------------------------------------------------------------|----------------------------------------------------------------------------------------------------------------|-------------------------------------------------------|----------------------------------------------------|
|                         |           | 0h                 | 0h              | 4h              | 0h                                                                       | 4h              | 0h                                                                                     | 4h                                                                                                             | 0h                                                    | 4h                                                 |
| Peak ratio %            | FRM001P02 | 18.7               | 18.5            | 18.4            | 18.3                                                                     | 18.5            | 19.3                                                                                   | 19.4                                                                                                           | 19.3                                                  | 19.7                                               |
|                         | FRM001P05 | 22.7               | 20.4            | 24.1            | 23.4                                                                     | 23.7            | 22.3                                                                                   | 21.8                                                                                                           | 22.7                                                  | 22.0                                               |
|                         | FRM001P06 | 16.4               | 21.6            | 18.3            | 18.8                                                                     | 18.5            | 16.3                                                                                   | 16.4                                                                                                           | 16.0                                                  | 16.4                                               |
|                         | FRM001P09 | 14.2               | 12.7            | 12.6            | 12.6                                                                     | 12.6            | 14.1                                                                                   | 13.9                                                                                                           | 14.1                                                  | 13.9                                               |
|                         | FRM001P18 | 16.2               | 16.4            | 16.5            | 16.5                                                                     | 16.5            | 17.0                                                                                   | 16.9                                                                                                           | 16.7                                                  | 16.8                                               |
|                         | FRM001P23 | 11.8               | 10.4            | 10.2            | 10.3                                                                     | 10.1            | 11.0                                                                                   | 11.6                                                                                                           | 11.1                                                  | 11.1                                               |
| Peptide purity          |           | 97%                | 92%             | 97%             | 92%                                                                      | 93%             | 93%                                                                                    | 92%                                                                                                            | 94%                                                   | 94%                                                |
| Impurities <sup>1</sup> |           | 0.45<br>(RRT 1.65) | 0.52 (RRT 0.53) | 0.54 (RRT 0.53) | 0.43 (RRT 0.09)<br>0.41 (RRT 0.23)<br>0.53 (RRT 0.53)<br>0.86 (RRT 2.58) | 0.52 (RRT 0.53) | 0.51 (RRT2.56)<br>1.35 (RRT2.80)<br>0.97 (RRT2.90)<br>1.15 (RRT2.91)<br>0.57 (RRT2.92) | 0.46 (RRT 2.57)<br>1.11 (RRT 2.83)<br>2.87 (RRT 2.91)<br>0.57 (RRT 2.93)<br>0.87 (RRT 2.79)<br>0.95 (RRT 2.88) | 0.55 (RRT 2.81)<br>1.01 (RRT 2.89)<br>1.37 (RRT 2.91) | 0.83 (RRT2.92)<br>1.18 (RRT2.94)<br>0.68 (RRT2.96) |

<sup>1</sup>: Result is reported as retention time relative to peptide FRM001P18 (first eluting peptide) and % area of the total sum of areas if the impurity peak area is ≥ 0.40%.

**Supplementary Table S13 (part 1/2).** The results of the in-use stability of the FRM001-M4 batch. After the t=0 h analysis, the same sample was stored at room temperature and analyzed again after 2 h and 4 h. For readability, only the 0 h and 4h data are presented; all 2h data were similar and complied.

| Test                    |           | t=0w               | t=2w -25 °C                              |                   | t=4w -25 °C                                                 |                    | t=8w -25 °C                                                                                                                                            |                                          | t=8w -80 °C                              |                                                                | t=12w -25 °C                             |              | t=12w -80 °C |              |
|-------------------------|-----------|--------------------|------------------------------------------|-------------------|-------------------------------------------------------------|--------------------|--------------------------------------------------------------------------------------------------------------------------------------------------------|------------------------------------------|------------------------------------------|----------------------------------------------------------------|------------------------------------------|--------------|--------------|--------------|
|                         |           | 0h                 | 0h                                       | 4h                | 0h                                                          | 4h                 | 0h                                                                                                                                                     | 4h                                       | 0h                                       | 4h                                                             | 0h                                       | 4h           | 0h           | 4h           |
| Peak ratio %            | FRM001P01 | 14.4               | 14.5                                     | 14.7              | 15.4                                                        | 15.5               | 15.1                                                                                                                                                   | 15.3                                     | 15.2                                     | 15.5                                                           | 15.1                                     | 14.8         | 14.8         | 15.1         |
|                         | FRM001P11 | 11.5               | 11.7                                     | 11.7              | 12.1                                                        | 12.0               | 12.7                                                                                                                                                   | 12.9                                     | 12.9                                     | 12.9                                                           | 12.8                                     | 12.3         | 12.3         | 12.1         |
|                         | FRM001P13 | 14.2               | 13.6                                     | 13.4              | 14.6                                                        | 14.5               | 14.7                                                                                                                                                   | 14.4                                     | 14.9                                     | 14.7                                                           | 14.4                                     | 14.6         | 14.6         | 14.4         |
|                         | FRM001P16 | 13.6               | 13.1                                     | 13.0              | 13.4                                                        | 13.2               | 13.1                                                                                                                                                   | 12.9                                     | 13.4                                     | 13.4                                                           | 13.6                                     | 13.4         | 13.4         | 13.5         |
|                         | FRM001P17 | 20.3               | 21.0                                     | 21.2              | 20.4                                                        | 20.6               | 20.4                                                                                                                                                   | 20.3                                     | 19.9                                     | 20.2                                                           | 19.5                                     | 20.0         | 20.0         | 20.1         |
|                         | FRM001P20 | 25.7               | 26.0                                     | 26.0              | 24.0                                                        | 24.3               | 24.0                                                                                                                                                   | 24.2                                     | 23.7                                     | 23.4                                                           | 24.6                                     | 24.8         | 24.8         | 24.8         |
| Peptide purity          |           | 97%                | 96%                                      | 96%               | 93%                                                         | 97%                | 91%                                                                                                                                                    | 96%                                      | 96%                                      | 96%                                                            | 96%                                      | 97%          | 98%          | 98%          |
| Impurities <sup>1</sup> |           | 0.43<br>(RRT 0.23) | 0.46<br>(RRT 0.23)<br>0.56<br>(RRT 3.84) | 0.48<br>(RRT3.84) | 1.13<br>(RRT3.63)<br>1.10<br>(RRT3.85)<br>0.60<br>(RRT4.08) | 0.54<br>(RRT 0.25) | 0.60<br>(RRT 0.21)<br>0.85<br>(RRT 0.23)<br>0.44<br>(RRT 3.56)<br>0.52<br>(RRT 3.62)<br>0.55<br>(RRT 3.74)<br>0.92<br>(RRT 3.85)<br>2.81<br>(RRT 4.03) | 0.67<br>(RRT 0.23)<br>0.45<br>(RRT 2.21) | 0.72<br>(RRT 0.25)<br>0.40<br>(RRT 2.21) | 0.48<br>(RRT 0.23)<br>0.71<br>(RRT 0.25)<br>0.43<br>(RRT 2.20) | 0.41<br>(RRT 3.73)<br>0.57<br>(RRT 4.08) | Not detected | Not detected | Not detected |

<sup>1</sup>: Result is reported as retention time relative to peptide FRM001P11 (first eluting peptide) and % area of the total sum of areas if the impurity peak area is  $\geq 0.40\%$ .

**Supplementary Table S13 (continued part 2/2).** The results of the in-use stability of the FRM001-M4 batch. After the t=0 h analysis, the same sample was stored at room temperature and analyzed again after 2 h and 4 h. For readability, only the 0 h and 4h data are presented; all 2h data were similar and complied.

| Test                    |           | t=0w               | t=16w -25 °C                       |                                  | t=16w -80 °C                     |                                    | t=32w -25 °C                                                                                             |                                                                                                                                   | t=32w -80 °C                                                                                                                                                                                                         |                                                                          |
|-------------------------|-----------|--------------------|------------------------------------|----------------------------------|----------------------------------|------------------------------------|----------------------------------------------------------------------------------------------------------|-----------------------------------------------------------------------------------------------------------------------------------|----------------------------------------------------------------------------------------------------------------------------------------------------------------------------------------------------------------------|--------------------------------------------------------------------------|
|                         |           | 0h                 | 0h                                 | 4h                               | 0h                               | 4h                                 | 0h                                                                                                       | 4h                                                                                                                                | 0h                                                                                                                                                                                                                   | 4h                                                                       |
| Peak ratio %            | FRM001P01 | 14.4               | 12.5                               | 12.4                             | 12.5                             | 12.4                               | 12.9                                                                                                     | 13.1                                                                                                                              | 14.7                                                                                                                                                                                                                 | 14.9                                                                     |
|                         | FRM001P11 | 11.5               | 11.0                               | 11.2                             | 11.1                             | 11.1                               | 10.8                                                                                                     | 11.1                                                                                                                              | 12.1                                                                                                                                                                                                                 | 12.1                                                                     |
|                         | FRM001P13 | 14.2               | 13.3                               | 13.1                             | 13.1                             | 13.0                               | 13.6                                                                                                     | 13.5                                                                                                                              | 13.9                                                                                                                                                                                                                 | 13.4                                                                     |
|                         | FRM001P16 | 13.6               | 10.6                               | 10.5                             | 10.8                             | 10.8                               | 11.0                                                                                                     | 11.2                                                                                                                              | 13.1                                                                                                                                                                                                                 | 12.8                                                                     |
|                         | FRM001P17 | 20.3               | 21.9                               | 22.0                             | 22.0                             | 22.1                               | 21.8                                                                                                     | 22.1                                                                                                                              | 21.0                                                                                                                                                                                                                 | 21.1                                                                     |
|                         | FRM001P20 | 25.7               | 30.7                               | 30.7                             | 30.5                             | 30.5                               | 29.9                                                                                                     | 28.9                                                                                                                              | 25.3                                                                                                                                                                                                                 | 25.7                                                                     |
| Peptide purity          |           | 97%                | 91%                                | 91%                              | 91%                              | 91%                                | 90%                                                                                                      | 92%                                                                                                                               | 88%                                                                                                                                                                                                                  | 93%                                                                      |
| Impurities <sup>1</sup> |           | 0.43<br>(RRT 0.23) | 0.53 (RRT 0.26)<br>0.72 (RRT 0.82) | 0.72 (RRT0.82)<br>0.52 (RRT0.36) | 0.49 (RRT0.36)<br>0.69 (RRT0.82) | 0.40 (RRT 0.36)<br>0.71 (RRT 0.82) | 1.73 (RRT4.97)<br>1.62 (RRT5.17)<br>0.82 (RRT5.20)<br>0.47 (RRT4.75)<br>0.42 (RRT5.14)<br>0.42 (RRT4.50) | 0.40 (RRT 4.49)<br>0.98 (RRT 4.98)<br>1.46 (RRT 5.16)<br>0.78 (RRT 5.18)<br>0.73 (RRT 5.23)<br>0.41 (RRT 4.56)<br>0.44 (RRT 5.27) | 0.72 (RRT4.52)<br>0.60 (RRT4.59)<br>0.73 (RRT4.61)<br>0.44 (RRT4.65)<br>0.64 (RRT4.66)<br>0.42 (RTT4.74)<br>0.73 (RRT4.79)<br>0.50 (RRT4.85)<br>0.97 (RRT4.91)<br>1.10 (RRT5.19)<br>1.56 (RRT5.23)<br>0.95 (RRT5.27) | 0.89 (RRT 5.20)<br>1.21 (RRT 5.24)<br>0.83 (RRT 5.28)<br>0.42 (RRT 4.48) |

<sup>1</sup>: Result is reported as retention time relative to peptide FRM001P11 (first eluting peptide) and % area of the total sum of areas if the impurity peak area is ≥ 0.40%.
